# Supplementary material for: Genome-Wide Screening Reveals Sex-Specific SNP Markers in Pengba (Osteobrama belangeri)
Source: Research Square preprint supplement (doi:10.21203/rs.3.rs-8163459/v1), 2025-12-09
Supplement: Supplementary file 1 [file ccb917370d5baeff278f9aaf.docx]

**Sup. Table 1. Codon preference table**

| **Amino acid** | **Codon preference** | **Amino acid** | **Codon preference** |
| --- | --- | --- | --- |
| **Ala** | GCA, GCC>GCG, GCT | **Asn** | AAC>AAT |
| **Gly** | GGC, GGA>GGG, GGT | **Glu** | GAA>GAG |
| **Leu** | CTA, TTG, CTT, CTC> CTG, TTA | **Cys** | TGC >TGT |
| **Val** | GTG, GTC>GTA, GTT | **Arg** | AGG, AGA>CGC CGA, CGG, CGT |
| **Ile** | ATC>ATT, ATA | **Pro** | CCC, CCG>CCA, CCT |
| **Tyr** | TAT > TAC | **His*** | CAC, CAT |
| **Gln** | CAG>CAA | **Phe*** | TTC, TTT |
| **Thr** | ACC, ACA > ACT, ACG | **Lys*** | AAG, AAA |
| **Ser** | AGT, TCC>AGC, TCA, TCT, TCG | **Asp*** | GAC, GAT |
| **Stop** | TAG >TAA, TGA |  |  |

**Sup. Table 2. Analysis of SNP distribution in exonic and intronic regions of genes**

| **Sl.No.** | **Gene name** | **Sequence length (bp)** | **No. of exons/ exon length** | **No. of Introns/ Intron position** | **Number of SNPs** | |
| --- | --- | --- | --- | --- | --- | --- |
|  |  |  |  |  | **Intron** | **Exon** |
| 1. | Gametogenetin-binding protein 2 (GGNBP2) | 9182 | 10 (2165) | 9 (3065-3889, 3982-4639, 5762-7512, 7606-9386, 9498-9797, 9879-10572, 10827-11122, 11222-11815, 11930-12038, 8195-11945) | 0 | 1 |
| 2. | Transcription factor SOX-30 (SOX30) | 8074 | 8 (2080) | 7 (3692-4826, 4863-4947, 5057-6166, 6280-6403, 6531-7033, 7208-7312, 7553-7777) | 0 | 2 |
| 3. | Ras-related protein Rab-39B (RAB39B) | 5757 | 5 (1297) | 4 (1223-2454, 2742-4205, 4368-4448, 4646-6324) | 0 | 3 |
| 4. | Tudor domain-containing protein 1 (TDRD1) | 3225 | 6 (869) | 5 (1293-1438, 1556-3069, 3238-3361, 3737-4203, 4242-4341) | 0 | 1 |
| 5. | Etoposide-induced protein 2.4 homolog (EI24) | 3535 | 12 (1151) | 11 (9437-9995, 10097-10380, 10527-10614, 10676-10757, 10825-10913, 11039-11606, 11727-11816, 11929-12011, 12124-12523, 12599-12692, 12852-12887) | 0 | 2 |
| 6. | Dynein regulatory complex protein 11 (DRC11) | 3857 | 5 (507) | 4 (7768-7974, 8058-9986, 10095-11192, 11326-11437) | 0 | 1 |
| 7. | Leukemia inhibitory factor receptor (LIFR) | 3197 | 11 (1677) | 10 (245-347, 502-881, 938-1034, 1255-1331, 1524-1683, 1786-1879, 2039-2124, 2239-2371, 2466-2551, 2616-2909) | 0 | 1 |
| 8. | Protein FAM83B (FAM83B) | 9182 | 10 (2166) | 9 (3065-3889, 3982-4639, 5762-7512, 7606-9386, 9498-9797, 9879-10572, 10827-11122, 11222-11815, 11930-12038) | 0 | 1 |
| 9. | Dual specificity protein phosphatase 1-A (DUSP1-A) | 2382 | 5 (1390) | 4 (2140-2807, 3028-3134, 3284-3463, 4031-4063) | 0 | 1 |
| 10. | Antizyme inhibitor 1 (AZIN1) | 3202 | 10 (1301) | 9 (14398-14518, 14693-14793, 14967-15561, 15691-15777, 15860-15952, 16028-16109, 16276-16355, 16472-16558, 16777-17422) | 0 | 2 |
| 11. | Neutrophil cytosolic factor 1 (NCF1) | 4121 | 10 (1008) | 9 (1744-1987, 2064-2814, 2981-3659, 3722-3811, 3935-4481, 4590-4699, 4818-4927, 5042-5141, 5309-5629) | 0 | 1 |
| 12. | GTPase HRas (HRAS) | 5674 | 5 (613) | 4 (1721-1824, 1893-3406, 3567-5951, 6131-7184) | 0 | 2 |
| 13. | Tripartite motif-containing protein 75 (TRIM75) | 2193 | 4 (995) | 3 (6343-7214, 7311-7413, 7724-7943) | 0 | 3 |
| 14. | Contactin-5 (CNTN5) | 11399 | 10 (1266) | 9 (271-358, 499-611, 648-735, 877-5178, 5414-7220, 7319-7343, 7423-7567, 7678-9248, 9436-11420) | 3 | 1 |
| 15. | Integrin beta-1-binding protein 1 (ITGB1BP1) | 4970 | 8 (940) | 7 (3136-3156, 3222-4457, 4608-4863, 4957-5904, 6036-6117, 6165-6416, 6524-7751) | 2 | 1 |
| 16. | HORMA domain-containing protein 1 (HORMAD1) | 7364 | 15 (1345) | 14 (29326-29673, 29757-30131, 30275-30371, 30425-31005, 31074-31273, 31426-31872, 32031-32128, 32222-32322, 32375-32485, 32554-32662, 32744-33013, 33077-36192, 36303-36410, 36532-36575) | 5 | 1 |
| 17. | Claudin-10 (CLDN10) | 4194 | 7 (914) | 6 (4428-4663, 4757-4848, 4969-6320, 6426-6512, 6595-6698, 6861-8263) | 1 | 1 |
| 18. | Ceramide synthase 2 (CERS2) | 11803 | 10 (917) | 9 (11172-3265, 13331-15129, 15188-15278, 15385-16165, 16340-17296, 17415-19058, 19178-20936, 20995-21094, 21146-22797) | 4 | 1 |
| 19. | Cryptochrome-1 (CRY1) | 6776 | 8 (868) | 7 (7322-7405, 7495-7613, 7719-9156, 9246-11279, 11423-13396, 13438-13651, 13818-13855) | 8 | 1 |
| 20. | GMP reductase 2 (GMPR2) | 9066 | 13 (2233) | 12 (1294-2664, 2839-2952, 3035-3158, 3266-3979, 4023-4209, 4370-4931, 5108-7120, 7678-7757, 7854-8655, 8734-8812, 8961-9136, 9164-9762) | 6 | 1 |
| 21. | Atlastin-3 (ATL3) | 16008 | 19 (2612) | 18 (5560-5752, 5888-7407, 7513-7599, 7651-9173, 9231-9651, 9745-9834, 9974-11312, 11441-11523, 11581-11669, 11742-13734, 13927-14011, 14252-16009, 16189-17095, 17281-17572, 17762-17820, 17931-20327, 20627-20793, 20871-21245) | 3 | 1 |
| 22. | Kininogen-1 (KNG1) | 6395 | 10 (1388) | 9 (3094-4135, 4220-4314, 4449-6248, 6508-6615, 6709-6874, 6986-7242, 7416-7920, 7994-8472, 8590-9135) | 2 | 1 |
| 23. | Protein O-glucosyltransferase 2 (POGLUT2) | 18812 | 23 (3475) | 22 (183-1406, 1594-2794, 2865-4012, 4077-4598, 4717-4847, 5027-6055, 6262-6339, 6546-6806, 6885-7736, 7910-8395, 8634-8740, 8951-9728, 9819-11125, 11231-12678, 12919-14354, 14496-16101, 16191-16261, 16373-16488, 16567-17326, 17695-17807, 17873-18294, 18528-18746) | 1 | 1 |
| 24. | SH3 and multiple ankyrin repeat domains protein 1 (SHANK1) | 6190 | 10 (1047) | 9 (225-331, 456 -1136, 1253-1456, 1517-2947, 3029-3127, 3264-4359, 4485-4582, 4666-5841, 5898-6139) | 7 | 1 |
| 25. | Cyclin-P (CCNP) | 4990 | 6 (999) | 5 (722-787, 947-2487, 2667-2951, 3126-4110, 4281-5389) | 3 | 1 |
| 26. | Armadillo repeat-containing protein 3 (ARMC 3) | 12343 | 25 (3083) | 24 (1405-1647, 1762-2550, 2623-2782, 2931-3138, 3216-3325, 3424-4970, 5089-5348, 5512-5597, 5793-5864, 5964-7080, 7182-7288, 7458-8274, 8412-8569, 8820-8948, 9022-9143, 9297-10356, 10541-10719, 10915-11161, 11338-12034, 12104-12190, 12317-12454, 12573-12665, 12747-13557) | 4 | 3 |
| 27. | Growth hormone-inducible transmembrane protein (GHITM) | 2612 | 7 (834) | 6 (156-256, 366-681, 824-1363, 1472-1676, 1789-2303, 2407-2501) | 1 | 0 |
| 28. | Zinc finger FYVE domain-containing protein 9 (ZFYVE9) | 12960 | 8 (927) | 7 (1129-1434, 1569-5446, 5612-5682, 5885-7120, 7201-11620, 11721-12866, 12931-13899 | 1 | 0 |
| 29. | Cystine/glutamate transporter (SLC7A11) | 4564 | 9 (1122) | 8 (728-1574, 1702-1766, 1883-1979, 2106-2921, 3037-3279, 3404-3488, 3593-4788, 4874-4958) | 2 | 0 |
| 30. | DALR anticodon-binding domain-containing protein 3 (DALRD3) | 4446 | 10 (1208) | 9 (5847-5925, 6085-6922, 7228-7309, 7401-7574, 7621-8801, 8861-8948, 9099-9624, 9690-9814, 9874-10009) | 1 | 0 |
| 31. | E3 ubiquitin-protein ligase ARIH2 (ARIH2) | 2572 | 7 (668) | 6 (125-232, 284-890, 1011-1178, 1323-2151, 2221-2318, 2427-2514) | 1 | 0 |
| 32. | Inosine-5'-monophosphate dehydrogenase 2 (IMPDH2) | 4377 | 10 (1104) | 9 (5200-6451, 6501-6612, 6715-7128, 7204-7441, 7649-7723, 7812-8731, 8932-9031, 9123-9198, 9348-9424) | 2 | 0 |
|  |  |  |  |  |  |  |
| 33. | Doublesex- and mab-3-related transcription factor 2 (DMRT2) | 2455 | 2 (787) | 1 (560-2226) | 1 | 0 |
| 34. | Doublesex- and mab-3-related transcription factor A2 (DMRTA2) | 7682 | 8 (2322) | 7 (135-1107, 1150-1391, 2245-2608, 3075-3171, 3328-3413, 3654-6342, 6709-7610) | 1 | 0 |
| 35. | Transcription factor Sox-19a (SOX19A) | 6595 | 7 (1460) | 6 (1436-1537, 1634-3583, 3805-3909, 4556-4864, 4997-6634, 6708-7732) | 5 | 0 |
| 36. | Retinoic acid receptor alpha-A (RARAA) | 5433 | 4 (645) | 3 (172-3087, 3249-4278, 4456-5294) | 1 | 0 |
| 37. | Histone deacetylase 7 (HD7) (HDAC7) | 4739 | 4 (383) | 3 (318-2801, 2852-3063, 3185-4841) | 2 | 0 |
| 38. | Histone acetyltransferase KAT2B (KAT2B) | 5994 | 13 (1352) | 12 (1996-2138, 2207-2280, 2399-2662, 2714-2891, 2935-3505, 3645-3976, 4123-4794, 4882-5280, 5442-6288, 6481-6625, 6670-6757, 6884-7800) | 1 | 0 |
| 39. | Major facilitator superfamily domain-containing protein 8 (MFSD8) | 3632 | 8 (730) | 7 (4795-5189, 5264-6681, 6796-6955, 7101-7248, 7308-7436, 7546-7624, 7760-8325) | 1 | 0 |
| 40. | Dual specificity protein phosphatase 22-A (DUSP22A) | 4379 | 2 (383) | 1 (3601-7595) | 1 | 0 |
| 41. | Mitochondrial inner membrane protease subunit 2 (IMMP2L) | 2029 | 3 (366) | 2 (778-2129, 2219-2527) | 1 | 0 |
| 42. | Exportin-6 (Exp6) (XPO6) | 7715 | 10 (1098) | 9 (280-406, 567-643, 842-2245, 2359-4860, 4952-5905, 5988-6497, 6587-6733, 6893-7684,7769-7863) | 1 | 0 |
| 43. | Stereocilin (STRC) | 4201 | 14 (1819) | 13 (7673-7812, 7964-8275, 8374-8645, 8795-8917, 9061-9391, 9548-9770, 9947-10107, 10271-10351, 10443-10541, 10739-10964, 11101-11187, 11277-11463, 11600-11726) | 1 | 0 |
| 44. | Dual specificity mitogen-activated protein kinase kinase 2 (MAP2K2) | 8952 | 7 (929) | 6 (3552-3633, 3845-3926, 4074-4144, 4223-6233, 6278-6312, 6612-12347) | 2 | 0 |
| 45. | Elongation factor 1-gamma (EEF1G) | 6623 | 10 (1382) | 9 (4901-5243, 5399-7232, 7358-7549, 7723-7807, 8028-8809, 8940-9930, 10075-10158, 10302-11124, 11189-11286) | 3 | 0 |
| 46. | Transmembrane channel-like protein 1 (TMC1) | 9395 | 20 (2766) | 19 (825-912, 1347-1840, 2014-2089, 2181-2270, 2353-2447, 2555-2660, 2760-3597, 3741-3830, 3976-4620, 4816-4898, 5079-5253, 5407-7235, 7365-7433, 7502-7600, 7683-7706, 7841-8603, 8730-8822, 8902-9637, 9750-9966) | 1 | 0 |
| 47. | Isoamyl acetate-hydrolyzing esterase 1 homolog (IAH1) | 1818 | 6 (701) | 5 (9724-9792, 9846-9928, 10072-10148, 10311-11106, 11229-11315) | 4 | 0 |
| 48. | Thyrotropin-releasing hormone-degrading ectoenzyme (TRHDE) | 2418 | 7 (709) | 6 (3149-3357, 3438-3718, 3794-4699, 4793-4877, 5026-5125, 5200-5320) | 2 | 0 |
| 49. | Epidermal growth factor receptor (EGFR) | 8525 | 16 (2036) | 15 (785-1061, 1204-2177, 2336-2544, 2636-3391, 3525-4918, 5119-5254, 5346-5461, 5536-5717, 5845-6146, 6264-6652, 6795-7078, 7198-8106, 8176-8271, 8407-8654, 8842-9043) | 1 | 0 |
| 50. | Carboxypeptidase A6 (CPA6) | 2734 | 4 (512) | 3 (1128-1235, 1338-2953, 3069-3563) | 1 | 0 |
| 51. | Aldehyde dehydrogenase (ALDH2) | 7367 | 7 (995) | 6 (3543-5558, 5674-5784, 5943-7392, 7558-7709, 7895-9374, 9478-10634) | 1 | 0 |
| 52. | Centrosomal protein of 76 kDa (Cep76) (CEP76) | 3498 | 6 (873) | 5 (3318-3439, 3522-4761, 4987-5076, 5263-5643, 5742-6528) | 3 | 0 |
| 53. | Palmitoyltransferase ZDHHC1 (ZDHHC1) | 6144 | 5 (525) | 4 (113-1520, 1624-1777, 1893-3418, 3511-6037) | 2 | 0 |
| 54. | Glypican-1 (GPC1) | 5146 | 7 (800) | 6 (1340-1430, 1486-2799, 2896-4532, 4599-4881, 5137-6064, 6139-6225) | 2 | 0 |
| 55. | Septin-6 (SEPTIN6) | 3598 | 5 (466) | 4 (673-750, 848-2497, 2660-3950, 4004-4112) | 6 | 0 |
| 56. | Tubby protein (TUB) | 4846 | 5 (697) | 4 (766-867, 1026-2200, 2259-3454, 3590-5261) | 1 | 0 |
| 57. | Sodium/glucose cotransporter 4 (SLC5A9) | 5869 | 10 (1352) | 9 (1146-1466, 1636-1754, 1971-2767, 3038-3759, 3825-4027, 4155-6009, 6076-6258, 6418-6647, 6730-6807) | 1 | 0 |
| 58. | Nucleolin (NCL) | 4253 | 12 (1140) | 11 (368-449, 577-762, 900-989, 1114-1293, 1378-1846, 1891-2042, 2137-2248, 2355-2513, 2568-2700, 2755-3293, 3350-4349) | 3 | 0 |
| 59. | Probable cationic amino acid transporter (SLC7A14A) | 6770 | 6 (1155) | 5 (317-1636, 1694-1835, 2045-3907, 4055-4178, 4397-6557) | 4 | 0 |
| 60. | Kinesin-like protein KIF3A (KIF3A) | 4889 | 8 (867) | 7 (1694-2872, 3001-3095, 3165-3248, 3303-4624, 4751-5877, 5989-6076, 6258-6377) | 1 | 0 |
| 61. | Striatin-3 (STRN3) | 5251 | 10 (1267) | 9 (2679-2875, 3026-3371, 3532-3643, 3731-4384, 4493-4671, 4813-4894, 5063-5192, 5315-7228, 7405-7765) | 4 | 0 |
| 62. | Neuroserpin (SERPINI1) | 3475 | 4 (401) | 3 (4558-5253, 5344-6230, 6318-7805) | 1 | 0 |
| 63. | Epsin-2 (EPN2) | 1124 | 5 (334) | 4 (5378-5454, 5505-5885, 5930-6055, 6160-6361) | 2 | 0 |
| 64. | UBA-like domain-containing protein 1 (UBALD1) | 4104 | 5 (760) | 4 (2173-3718, 3925-4073, 4165-4524, 4608-5892) | 1 | 0 |
| 65. | Synembryn-A (Protein Ric-8A) (RIC8A) | 1937 | 3 (372) | 2 (538-2042, 2151-2208) | 1 | 0 |
| 66. | Protein cereblon (zcrbn) (CRBN) | 7178 | 13 (1511) | 12 (348-491, 575-1811, 1875-2466, 2552-2635, 2752-2880, 2946-3754, 3887-3981, 4156-4328, 4354-5795, 5972-6072, 6288-7014, 7138-7259) | 3 | 0 |
| 67. | MOB kinase activator 2 (MOB2) | 3063 | 6 (486) | 5 (16721-16858, 16971-18000, 18165-19455, 19550-19580, 19609-19690) | 4 | 0 |
| 68. | Dynein assembly factor 3 (DNAAF3) | 3954 | 9 (1295) | 8 (5290-5996, 6200-6674, 6776-6915, 6991-7085, 7201-7333, 7557-7950, 8074-8687, 8865-8957) | 1 | 0 |
